# Supplementary material for: The Periplasmic Protein TolB as a Potential Drug Target in Pseudomonas aeruginosa
Source: PubMed Central journal article supplement (PMC4122361; doi:10.1371/journal.pone.0103784), 2014-08-05
Supplement: pone.0103784.s001.pdf [file pone.0103784.s001.pdf]

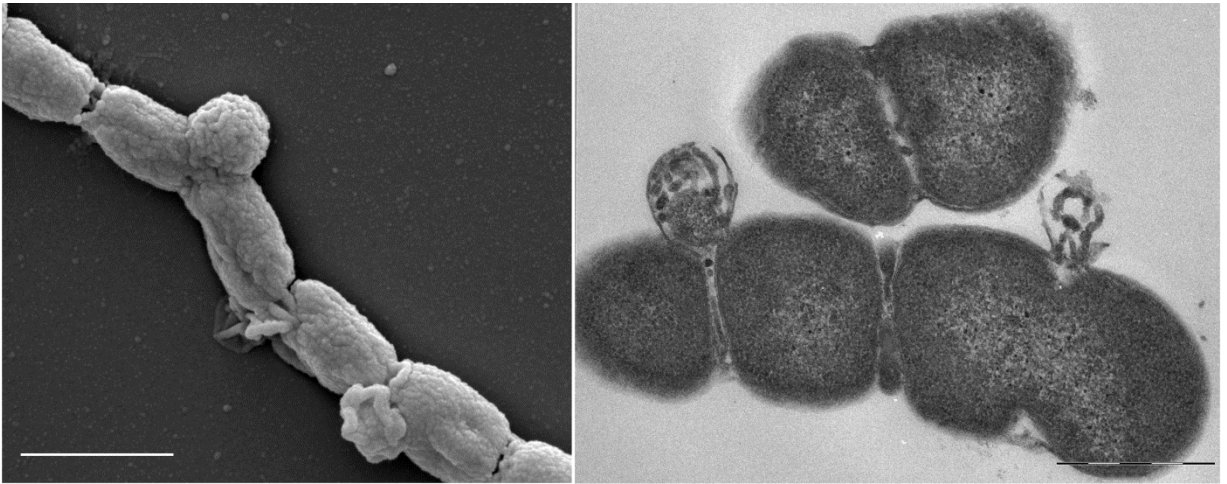

**Figure S1.** SEM and TEM images (left and right panels, respectively) of TolB-deficient mutant cells grown as described in the legend to Figure 3A. Bars: 1  $\mu\text{m}$  (left panel) or 0.5  $\mu\text{m}$  (right panel).
