# Supplementary material for: The Periplasmic Protein TolB as a Potential Drug Target in Pseudomonas aeruginosa
Source: PubMed Central journal article supplement (PMC4122361; doi:10.1371/journal.pone.0103784), 2014-08-05
Supplement: pone.0103784.s002.pdf [file pone.0103784.s002.pdf]

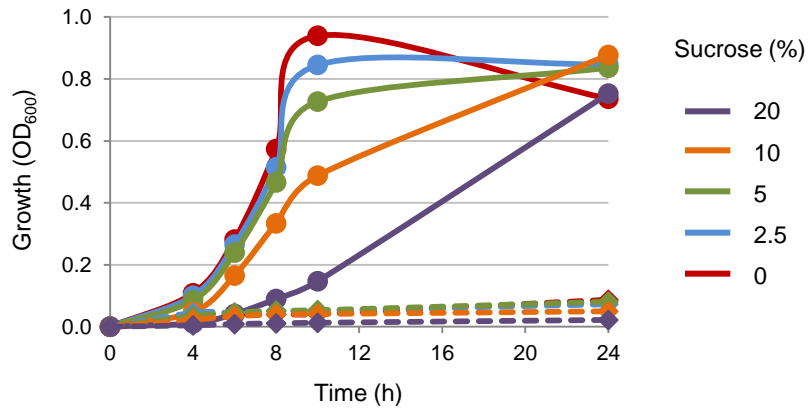

**Figure S2.** Growth curves of the wild-type strain PAO1 (circles, solid lines) and the PAO1 *toIB* conditional mutant (diamonds, dashed lines) in microtiter plates at 37°C in MH broth supplemented with increasing concentrations of sucrose (0-20%). The graph is representative of three independent experiments giving similar results.
