# Supplementary material for: The Periplasmic Protein TolB as a Potential Drug Target in Pseudomonas aeruginosa
Source: PubMed Central journal article supplement (PMC4122361; doi:10.1371/journal.pone.0103784), 2014-08-05
Supplement: pone.0103784.s003.pdf [file pone.0103784.s003.pdf]

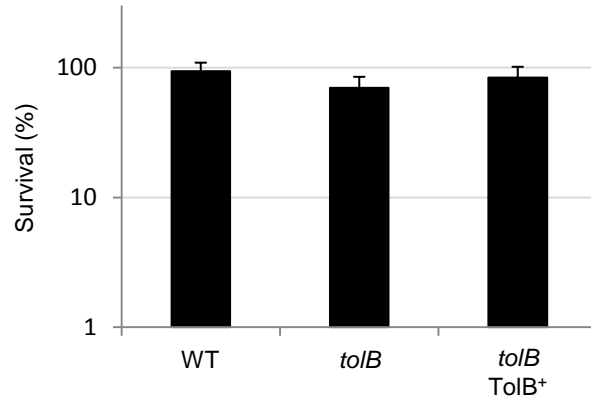

**Figure S3.** Viability of PAO1 wild-type cells (WT), TolB-deficient mutant cells (*tolB*) and TolB-proficient mutant cells (*tolB TolB<sup>+</sup>*) after 3-h incubation in saline solution at 37°C, expressed as percent survival with respect to the number of viable cells at time 0. Results are the mean ( $\pm$  SD) of four independent experiments. No significant differences were detected (one-way ANOVA).
