# Supplementary material for: The Periplasmic Protein TolB as a Potential Drug Target in Pseudomonas aeruginosa
Source: PubMed Central journal article supplement (PMC4122361; doi:10.1371/journal.pone.0103784), 2014-08-05
Supplement: pone.0103784.s004.pdf [file pone.0103784.s004.pdf]

**Table S1.** Primers used in this study <sup>a</sup>

| Primer name             | Sequence <sup>b</sup>               | Restriction site | Application                                  |
|-------------------------|-------------------------------------|------------------|----------------------------------------------|
| <i>tolB</i> _FW         | 5'-CCCAAGCTTCTGTGAGTACCCTGATTCGC-3' | HindIII          | Generation of the pBEM9- <i>tolB</i> plasmid |
| <i>tolB</i> _RV         | 5'-CGGAATTCAGTTCAGGTAAGGGGACC-3'    | EcoRI            | Generation of the pBEM9- <i>tolB</i> plasmid |
| <i>tolB</i> mut_UP_FW   | 5'-CCGCTCGAGGCCAAGGCCGCCG-3'        | XhoI             | Generation of the pDM4Δ <i>tolB</i> plasmid  |
| <i>tolB</i> mut_UP_RV   | 5'-CGGGATCCAGCGCAATGCGAATCAGG-3'    | BamHI            | Generation of the pDM4Δ <i>tolB</i> plasmid  |
| <i>tolB</i> mut_DOWN_FW | 5'-CGGGATCCCCTCAGGGCGATGTGC-3'      | BamHI            | Generation of the pDM4Δ <i>tolB</i> plasmid  |
| <i>tolB</i> mut_DOWN_RV | 5'-GCTCTAGACACGCAGGTGCTTGGG-3'      | XbaI             | Generation of the pDM4Δ <i>tolB</i> plasmid  |

<sup>a</sup> All PCRs were performed using the genomic DNA of *P. aeruginosa* PAO1 as the template.

<sup>b</sup> The restriction site used for cloning is underlined in the primer sequence.
